# Supplementary material for: Excited-state proton-relay dynamics of 7-hydroxyquinoline controlled by solvent reorganization in room temperature ionic liquids
Source: Royal Society of Chemistry journal article supplement (doi:10.1039/c1cp22329a), 2011-11-10
Supplement: c1cp22329a.pdf [file c1cp22329a.pdf]

## **Electronic Supplementary Information**

### **Excited-state proton-relay dynamics of 7-hydroxyquinoline controlled by solvent reorganization in room temperature ionic liquids**

*Hyeongtaek Lim,<sup>a</sup> Hyeok, Jeong,<sup>a</sup> Sun-Young Park,<sup>a</sup> Jin Yong Lee<sup>b</sup> and Du-Jeon Jang<sup>\*a</sup>*

<sup>a</sup>School of Chemistry, Seoul National University, NS60, Seoul 151-747, Korea

<sup>b</sup>Department of Chemistry, Sungkyunkwan University, Suwon 440-746, Korea

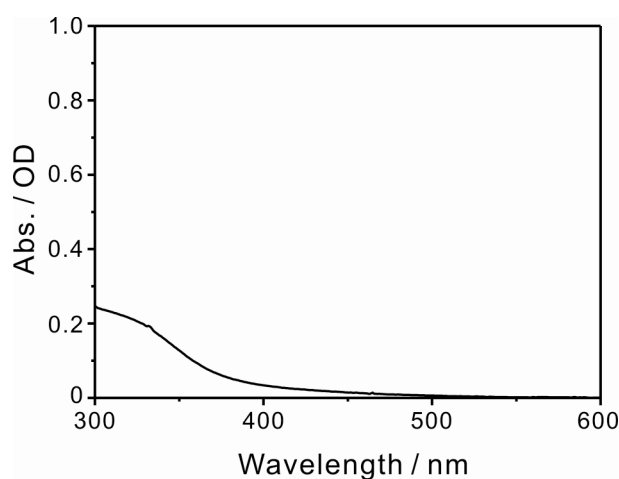

**Fig. S1** Absorption spectrum of neat [bmim][PF<sub>6</sub>].

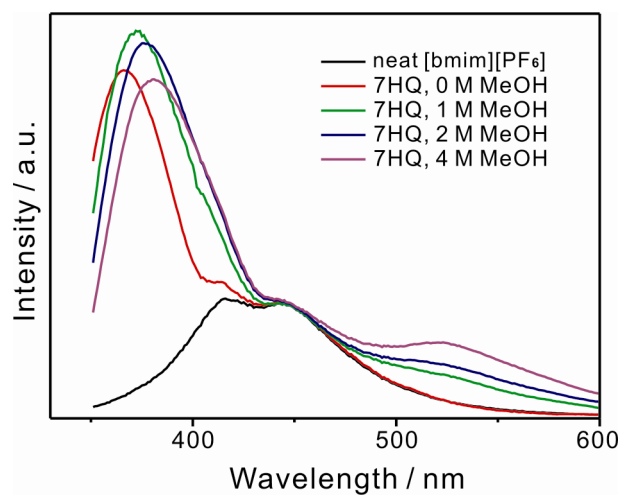

**Fig. S2** Emission spectra, with excitation at 320 nm, of neat [bmim][PF<sub>6</sub>] and 0.1 mM 7HQ in [bmim][PF<sub>6</sub>] having methanol concentrations indicated inside.
